# Supplementary material for: SF-087-5 肝類洞免疫能の低下が急性肺障害を惹起する : 肝・肺臓器相関(第107回日本外科学会定期学術集会)
Source: Springer Nature journal article supplement (doi:10.1186/s13256-023-03858-5), 2007-03-10

**Figure S1.** Time line according to the 2013 CARE Checklist.

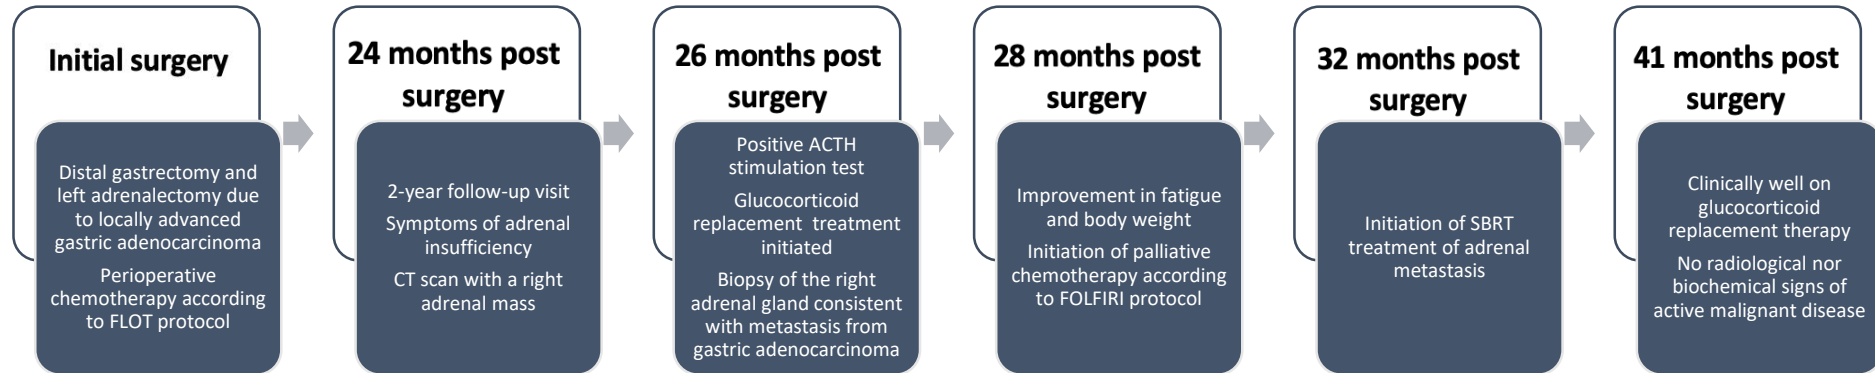

Supplement: MOESM1 [file 25225978]
